# Supplementary material for: Enhanced visible-light photocatalysis in three-dimensional rose-like ZnO with oxygen vacancies and Ag nanoparticles
Source: Royal Society of Chemistry journal article supplement (doi:10.1039/d3nj04722a), 2023-12-05
Supplement: d3nj04722a1.pdf [file d3nj04722a1.pdf]

## Supplementary data

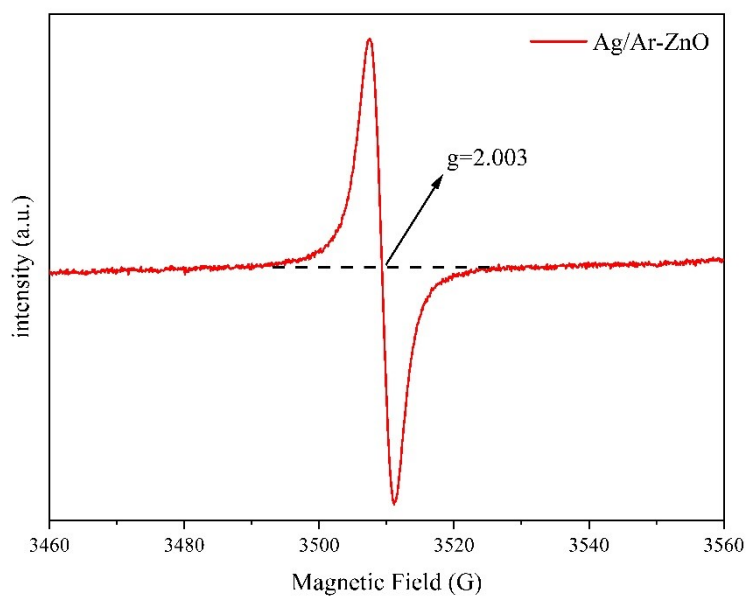

Fig. S1 EPR spectra of Ag/Ar-ZnO photocatalyst

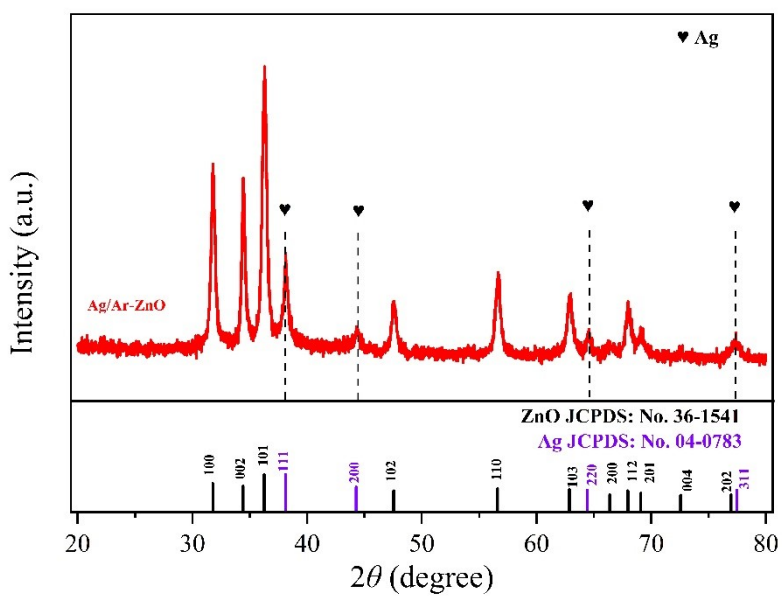

Fig. S2 XRD pattern of Ag/Ar-ZnO photocatalyst after the photocatalytic reaction

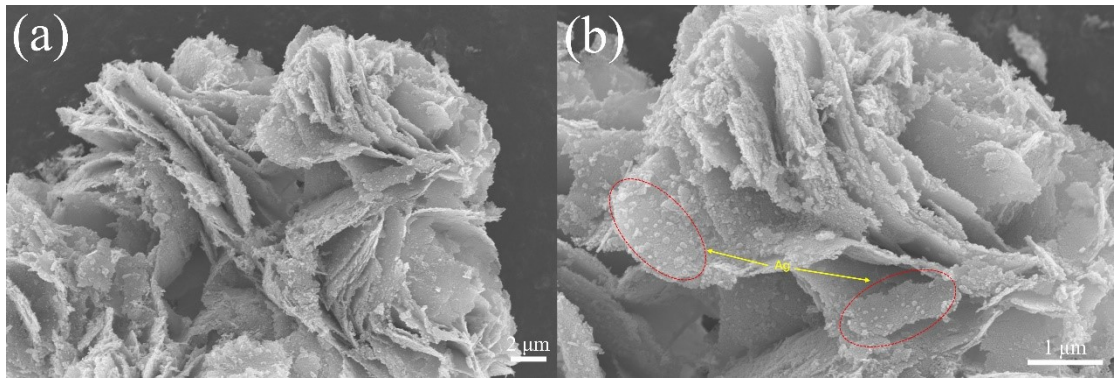

Fig. S3 SEM images of Ag/Ar-ZnO photocatalyst after the photocatalytic reaction
